# Supplementary material for: Oxidative Stress Mediates Physiological Costs of Begging in Magpie (Pica pica) Nestlings
Source: PubMed Central journal article supplement (PMC3393730; doi:10.1371/journal.pone.0040367), 2012-07-10
Supplement: pone.0040367.s002.pdf [file pone.0040367.s002.pdf]

**Oxidative stress mediates physiological costs of begging in magpie (*Pica pica*) nestlings**

**Gregorio Moreno-Rueda, Tomás Redondo, Cristina E. Trenzado, Ana Sanz, Jesús M. Zúñiga**

**Table S1.** Restricted Maximum Likelihood Estimation General Linear Mixed Model (REML-GLMM) showing the effect of treatment on protein concentration, after controlling for nest (random), date, growth rate and immune response to phytohaemagglutinin.

|                 | <i>df</i> | <i>t</i> | <i>P</i> |
|-----------------|-----------|----------|----------|
| Intercept       | 16        | 1.01     | 0.328    |
| Treatment       | 16        | 2.60     | 0.019    |
| Date            | 16        | 1.01     | 0.238    |
| Growth rate     | 16        | 0.18     | 0.863    |
| Immune response | 16        | 2.19     | 0.044    |
