# Supplementary material for: Oxidative Stress Mediates Physiological Costs of Begging in Magpie (Pica pica) Nestlings
Source: PLOS journal article supplement (doi:10.1371/journal.pone.0040367), 2012-07-10
Supplement: S5 (10.1371/journal.pone.0040367.s005) [file journal.pone.0040367.s005]

**Oxidative stress mediates physiological costs of begging in magpie (*Pica pica*) nestlings**

**Gregorio Moreno-Rueda, Tomás Redondo, Cristina E. Trenzado, Ana Sanz, Jesús M. Zúñiga**

**Table S4.** Restricted Maximum Likelihood Estimation General Linear Mixed Model (REML-GLMM) showing the effect of treatment on the concentration of active enzyme glutathione reductase (GR), after controlling for nest (random), date, growth rate and immune response to phytohaemagglutinin.

|                 | <i>df</i> | <i>t</i> | <i>P</i> |
|-----------------|-----------|----------|----------|
| Intercept       | 16        | 2.63     | 0.018    |
| Treatment       | 16        | 1.05     | 0.310    |
| Date            | 16        | 2.63     | 0.018    |
| Growth rate     | 16        | 0.25     | 0.805    |
| Immune response | 16        | 2.60     | 0.016    |
